# Supplementary material for: Metal-free methylation of a pyridine N-oxide C–H bond by using peroxides
Source: Royal Society of Chemistry journal article supplement (doi:10.1039/c5ob01900a), 2015-01-01

## Metal-Free Methylation of Pyridine *N*-Oxides C–H Bond Using Peroxides

Gang Li\*, Suling Yang, Bingjie Lv<sup>§</sup>, Qingqing Han<sup>§</sup>, Xingxing Ma<sup>§</sup>, Kai Sun, Zhiyong Wang, Feng Zhao, Yunhe Lv, and Hankui Wu\*

College of Chemistry and Chemical Engineering, Anyang Normal University, Anyang, 455000 P. R. China.

Fax: (+86)-372-2900040; E-mail: [ligang@aynu.edu.cn](mailto:ligang@aynu.edu.cn); [wuhankui222@126.com](mailto:wuhankui222@126.com)

<sup>§</sup> These authors contributed equally to this work.

### Supporting Information

#### Table of contents

|                                                                        |    |
|------------------------------------------------------------------------|----|
| 1. General Information                                                 | S1 |
| 2. Preparation of Pyridine- <i>N</i> -Oxide Derivatives                | S2 |
| 3. Methylation of Pyridine- <i>N</i> -Oxide Using peroxides            | S2 |
| 4. Preparation of 2- <i>d</i> <sub>1</sub> -Quinoline- <i>N</i> -Oxide | S2 |
| 5. KIE Experiment                                                      | S3 |
| 6. References                                                          | S3 |
| 7. Data and Spectra of <sup>1</sup> H NMR and <sup>13</sup> C NMR      | S3 |

#### 1. General Information

Unless otherwise noted, reagents and solvents were purchased and used directly without any further purification. Column chromatography were performed on silica gel 200-300 mesh. <sup>1</sup>H NMR and <sup>13</sup>C NMR spectra were registered on a Bruker Ascend™ 400 spectrometer (Germany). <sup>1</sup>H NMR peaks were labeled as singlet (s), doublet (d), triplet (t), and multiplet (m). Chemical shifts were reported in units (ppm) referenced to 0.0 ppm of TMS in the <sup>1</sup>H spectrum and 77.0 ppm of CDCl<sub>3</sub> in the <sup>13</sup>C spectrum. All coupling constants were reported in Hertz (Hz). HRMS data were obtained on a Waters LCT Premierxe™ (USA).

#### 2. Preparation of Pyridine-*N*-Oxide Derivatives

Under vigorous magnetic stirring, 3-Chloroperbenzoic acid (*m*CPBA) (345 mg, 2 mmol) in CH<sub>2</sub>Cl<sub>2</sub> (5 mL) was dropped into solution of pyridine derivatives (2 mmol) in CH<sub>2</sub>Cl<sub>2</sub> (5 mL) cooled to 0°C. After the completion of this course, the reaction mixture was allowed up to room temperature and stirred overnight. An aqueous solution of saturated NaHCO<sub>3</sub> was added to the mixture to neutralize residual *m*CPBA. The resulting mixture was extracted with CH<sub>2</sub>Cl<sub>2</sub> (3x 10 mL). The organic phase were combined and washed with a saturated NaCl solution (3x 5 mL). The organic layers were dried over anhydrous Na<sub>2</sub>SO<sub>4</sub>, filtered and evaporated under reduced pressure to give crude product, which was purified by column chromatography (silica gel 200-300 mesh, EtOAc: methanol (8:1) as eluent). The product was identified by <sup>1</sup>H-NMR and MS spectra and compared to the previous literature.

### 3. Methylation of Pyridine-*N*-Oxide Using peroxides

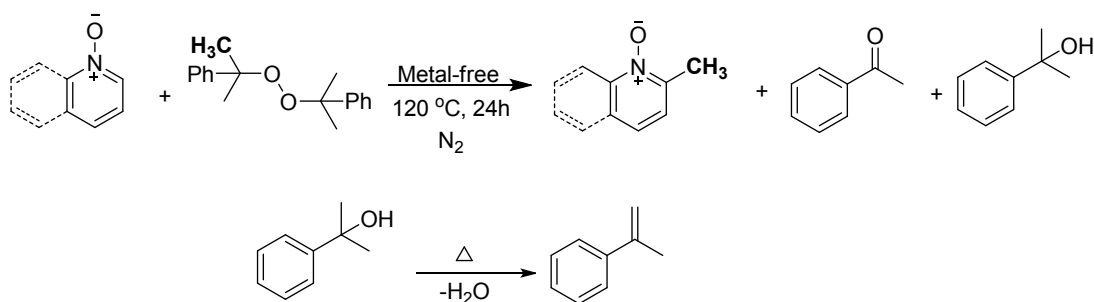

Pyridine-*N*-oxide (0.5 mmol), DCP (1 mmol, 2 equiv.) were charged into a 30-mL pressure tube sealed with rubber plugs. The reaction mixture was stirred at 120 °C for 24 h under nitrogen atmosphere. After the starting material was completely consumed (based on thin layer chromatography (TLC) monitoring, EtOAc: methanol as eluent), the reaction was cooled down to room temperature. The mixture was purified by column chromatography on silica gel(200-300 mesh) to afford desired products.

### 4. Preparation of 2-*d*<sub>1</sub>-Quinoline-*N*-Oxide.

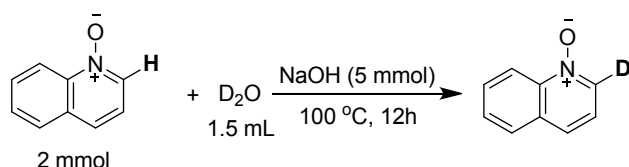

D<sub>2</sub>O (1.5 mL), NaOH (200 mg, 5 mmol), quinoline-*N*-oxide (258 mg, 2.0 mmol) were weighed into 30-mL pressure tube sealed with rubber plugs. The reaction mixture was stirred at 100 °C for overnight. After cooling to room temperature, the mixture was then extracted with Chloroform (3 x 10 mL). The combined organic

phases were washed with saturated NaCl solution (3 x 5 mL), dried over MgSO<sub>4</sub>, and filtered. Chloroform was removed under reduced pressure to obtain the product. Deuterium incorporation was detected to be 91% by <sup>1</sup>H NMR in CDCl<sub>3</sub>. Peak areas at 8.76 ppm and 8.53 ppm were compared to obtain the deuterium incorporation (see <sup>1</sup>H spectrum). Spectral data were consistent with related reports<sup>[1]</sup>.

## 5. KIE Experiment

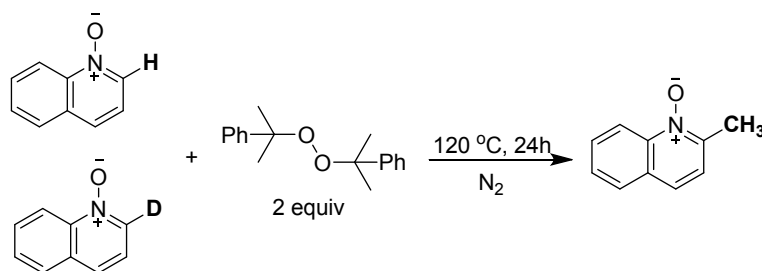

2-d<sub>1</sub>-quinoline-*N*-oxide and quinoline-*N*-oxide (1:1) (totally 0.5 mmol), DCP (1 mmol, 2 equiv) were added into pressure tube sealed with rubber plugs. The reaction mixture was stirred at 120 °C for 3 h under nitrogen atmosphere. After cooling to room temperature, residual starting material (mixture of 2-d<sub>1</sub>-quinoline-*N*-oxide and quinoline-*N*-oxide) was recovered by column chromatography on silica gel (200-300 mesh), which was characterized by <sup>1</sup>H NMR spectroscopy. Peak areas at 8.76 ppm and 8.53 ppm were compared to give nearly 1:1 ratio of 2-d<sub>1</sub>-quinoline-*N*-oxide to quinoline-*N*-oxide in residual material<sup>[2]</sup>.

## 6. References

- [1] Sylvester, K. T.; Wu, K.; Doyle, A. G.; *J. Am. Chem. Soc.*, **2012**, *134*, 16967-16970.
- [2] G. Li, C. Q. Jia, K. Sun, *Org. Lett.* **2013**, *15*, 5198-5201.

## 7. Data and Spectra of <sup>1</sup>H NMR and <sup>13</sup>C NMR

### 2-methylpyridine 1-oxide (3a)

**3a** was obtained as yellow oil. <sup>1</sup>H NMR (400 MHz, CDCl<sub>3</sub>) δ 8.25 (d, *J* = 6.0 Hz, 1H), 7.31–7.23 (m, 1H), 7.17 (2H), 2.51 (s, 3H). <sup>13</sup>C NMR (101 MHz, CDCl<sub>3</sub>) δ 149.15, 139.42, 126.55, 125.67, 123.57, 17.81. HRMS (ESI) Calcd. For C<sub>6</sub>H<sub>8</sub>NO: [M+H]<sup>+</sup>, 110.0606, Found: *m/z*. 110.0598

### 2,6-dimethylpyridine 1-oxide (4a)

**4a** was obtained as yellow oil. <sup>1</sup>H NMR (400 MHz, CDCl<sub>3</sub>) δ 7.14 (d, *J* = 7.3 Hz, 2H), 7.09 (d, *J* = 7.5 Hz, 1H), 2.53 (s, 6H). <sup>13</sup>C NMR (101 MHz, CDCl<sub>3</sub>) δ 149.07, 124.74, 123.96, 18.27. HRMS (ESI) Calcd. For C<sub>7</sub>H<sub>10</sub>NO: [M+H]<sup>+</sup>, 124.0762, Found: *m/z*.

---

124.0758

**2,4-dimethylpyridine 1-oxide (3b)**

**3b** was obtained as yellow oil (27mg, 45%). <sup>1</sup>H NMR (400 MHz, CDCl<sub>3</sub>) δ 8.16 (d, *J* = 6.5 Hz, 1H), 7.08 (s, 1H), 6.96 (d, *J* = 5.9 Hz, 1H), 2.50 (s, 3H), 2.32 (s, 3H). <sup>13</sup>C NMR (101 MHz, CDCl<sub>3</sub>) δ 148.24, 138.69, 137.31, 127.17, 124.33, 77.40, 77.08, 76.76, 20.20, 17.71. HRMS (ESI) Calcd. For C<sub>7</sub>H<sub>10</sub>NO: [M+H]<sup>+</sup>, 124.0762, Found: *m/z*. 124.0760

**2,4,6-trimethylpyridine 1-oxide (4b)**

**4b** was obtained as yellow oil (21mg, 31%). <sup>1</sup>H NMR (400 MHz, CDCl<sub>3</sub>) δ 6.96 (s, 2H), 2.50 (s, 6H), 2.28 (s, 3H). <sup>13</sup>C NMR (101 MHz, CDCl<sub>3</sub>) δ 148.20, 124.75, 77.34, 77.03, 76.71, 20.19, 18.18. HRMS (ESI) Calcd. For C<sub>8</sub>H<sub>12</sub>NO: [M+H]<sup>+</sup>, 138.0919, Found: *m/z*. 138.0909

**4-methoxy-2-methylpyridine 1-oxide (3c)**

**3c** was obtained as yellow oil (32mg, 47%). <sup>1</sup>H NMR (400 MHz, CDCl<sub>3</sub>) δ 8.18 (d, *J* = 7.2 Hz, 1H), 6.80 (s, 1H), 6.73 (m, 1H), 3.86 (s, 3H), 2.53 (s, 3H). <sup>13</sup>C NMR (101 MHz, CDCl<sub>3</sub>) δ 157.96, 150.02, 140.16, 111.63, 109.90, 55.97, 18.33. HRMS (ESI) Calcd. For C<sub>7</sub>H<sub>10</sub>NO<sub>2</sub>: [M+H]<sup>+</sup>, 140.0712, Found: *m/z*. 140.0704

**4-methoxy-2,6-dimethylpyridine 1-oxide (4c)**

**4c** was obtained as yellow oil (21mg, 28%). <sup>1</sup>H NMR (400 MHz, CDCl<sub>3</sub>) δ 6.70 (s, 2H), 3.82 (s, 3H), 2.53 (s, 6H). <sup>13</sup>C NMR (101 MHz, CDCl<sub>3</sub>) δ 156.72, 149.91, 109.73, 55.71, 18.77. HRMS (ESI) Calcd. For C<sub>8</sub>H<sub>12</sub>NO<sub>2</sub>: [M+H]<sup>+</sup>, 154.0868, Found: *m/z*. 154.0864

**2-methyl-4-nitropyridine 1-oxide (3d)**

**3d** was obtained as pale yellow solid (34mg, 44%). <sup>1</sup>H NMR (400 MHz, CDCl<sub>3</sub>) δ 8.30 (d, *J* = 7.1 Hz, 1H), 8.12 (d, *J* = 3.0 Hz, 1H), 7.97 (dd, *J* = 7.1, 3.1 Hz, 1H), 2.53 (s, 3H). <sup>13</sup>C NMR (101 MHz, CDCl<sub>3</sub>) δ 150.59, 141.68, 140.05, 120.66, 118.10, 18.01. HRMS (ESI) Calcd. For C<sub>6</sub>H<sub>7</sub>N<sub>2</sub>O<sub>3</sub>: [M+H]<sup>+</sup>, 155.0457, Found: *m/z*. 155.0461

**2,6-dimethyl-4-nitropyridine 1-oxide (4d)**

**4d** was obtained as pale yellow solid (29mg, 35%). <sup>1</sup>H NMR (400 MHz, CDCl<sub>3</sub>) δ 7.97 (s, 2H), 2.52 (s, 6H). <sup>13</sup>C NMR (101 MHz, CDCl<sub>3</sub>) δ 150.33, 140.73, 117.92,

---

18.52. HRMS (ESI) Calcd. For  $C_7H_9N_2O_3$ :  $[M+H]^+$ , 169.0613, Found:  $m/z$ . 169.09610

**2,3,6-trimethyl-4-nitropyridine 1-oxide (4e)**

**4e** was obtained as pale yellow solid (75mg, 82%).  $^1H$  NMR (400 MHz,  $CDCl_3$ )  $\delta$  7.72 (s, 1H), 2.59 (s, 3H), 2.52 (d,  $J = 4.1$  Hz, 6H).  $^{13}C$  NMR (101 MHz,  $CDCl_3$ )  $\delta$  150.69, 147.33, 143.80, 126.61, 118.05, 18.21, 15.81, 14.95, HRMS (ESI) Calcd. For  $C_8H_{11}N_2O_3$ :  $[M+H]^+$ , 183.0770, Found:  $m/z$ . 183.0765

**2-methylquinoline 1-oxide (3f)**

**3f** was obtained as yellow oil (57mg, 72%).  $^1H$  NMR (400 MHz,  $CDCl_3$ )  $\delta$  8.77 (d,  $J = 8.8$  Hz, 1H), 7.79 (d,  $J = 8.1$  Hz, 1H), 7.72 (t,  $J = 7.8$  Hz, 1H), 7.61 (d,  $J = 8.5$  Hz, 1H), 7.55 (t,  $J = 7.5$  Hz, 1H), 7.28 (d,  $J = 8.5$  Hz, 1H), 2.70 (s, 3H).  $^{13}C$  NMR (101 MHz,  $CDCl_3$ )  $\delta$  145.71, 141.42, 130.21, 129.10, 127.96, 127.63, 125.16, 122.91, 119.36, 18.72. HRMS (ESI) Calcd. For  $C_{10}H_{10}NO$ :  $[M+H]^+$ , 160.0762, Found:  $m/z$ . 160.0751

**2,8-dimethylquinoline 1-oxide (3g)**

**3g** was obtained as yellow oil (59mg, 68%).  $^1H$  NMR (400 MHz,  $CDCl_3$ )  $\delta$  7.66 – 7.61 (m, 1H), 7.56 (d,  $J = 8.5$  Hz, 1H), 7.44 – 7.37 (m, 2H), 7.27 (d,  $J = 4.8$  Hz, 1H), 3.23 (s, 3H), 2.64 (s, 3H).  $^{13}C$  NMR (101 MHz,  $CDCl_3$ )  $\delta$  146.88, 141.54, 133.50, 133.19, 131.23, 127.15, 126.81, 125.57, 122.69, 25.20, 19.14. HRMS (ESI) Calcd. For  $C_{11}H_{12}NO$ :  $[M+H]^+$ , 174.0919, Found:  $m/z$ . 174.0911

**2,6-dimethylquinoline 1-oxide (3h)**

**3h** was obtained as yellow oil (58mg, 67%).  $^1H$  NMR (400 MHz,  $CDCl_3$ )  $\delta$  8.67 (d,  $J = 8.6$  Hz, 1H), 7.58 (d,  $J = 8.8$  Hz, 3H), 7.27 (s, 1H), 2.72 (s, 3H), 2.54 (s, 3H).  $^{13}C$  NMR (101 MHz,  $CDCl_3$ )  $\delta$  145.04, 137.79, 132.46, 126.90, 124.80, 122.94, 119.38, 21.29, 18.63. HRMS (ESI) Calcd. For  $C_{11}H_{12}NO$ :  $[M+H]^+$ , 174.0919, Found:  $m/z$ . 174.0708

**6-chloro-2-methylquinoline 1-oxide (3i)**

**3i** was obtained as yellow oil (52mg, 54%).  $^1H$  NMR (400 MHz,  $CDCl_3$ )  $\delta$  8.73 (d,  $J = 9.3$  Hz, 1H), 7.82 (s, 1H), 7.70 – 7.64 (m, 1H), 7.55 (d,  $J = 8.6$  Hz, 1H), 7.35 (d,  $J = 8.6$  Hz, 1H), 2.71 (s, 3H).  $^{13}C$  NMR (101 MHz,  $CDCl_3$ )  $\delta$  145.97, 140.16, 133.94, 130.92, 129.96, 126.65, 124.22, 123.72, 121.57, 18.67. HRMS (ESI) Calcd. For

C<sub>10</sub>H<sub>9</sub>ClNO: [M+H]<sup>+</sup>, 194.0373, Found: *m/z*. 194.0372

**1-methyloquinoline 2-oxide (3j)**

**3j** was obtained as yellow oil (65mg, 82%). <sup>1</sup>H NMR (400 MHz, CDCl<sub>3</sub>) δ 8.29 – 8.18 (m, 1H), 7.96 (d, *J* = 8.3 Hz, 1H), 7.78 (d, *J* = 7.6 Hz, 1H), 7.71 – 7.63 (m, 1H), 7.63 – 7.52 (m, 2H), 2.90 (s, 3H). <sup>13</sup>C NMR (101 MHz, CDCl<sub>3</sub>) δ 145.58, 136.51, 129.08, 128.91, 128.84, 128.37, 127.38, 124.02, 121.84, 12.91. HRMS (ESI) Calcd. For C<sub>10</sub>H<sub>10</sub>NO: [M+H]<sup>+</sup>, 160.0762, Found: *m/z*. 160.0765

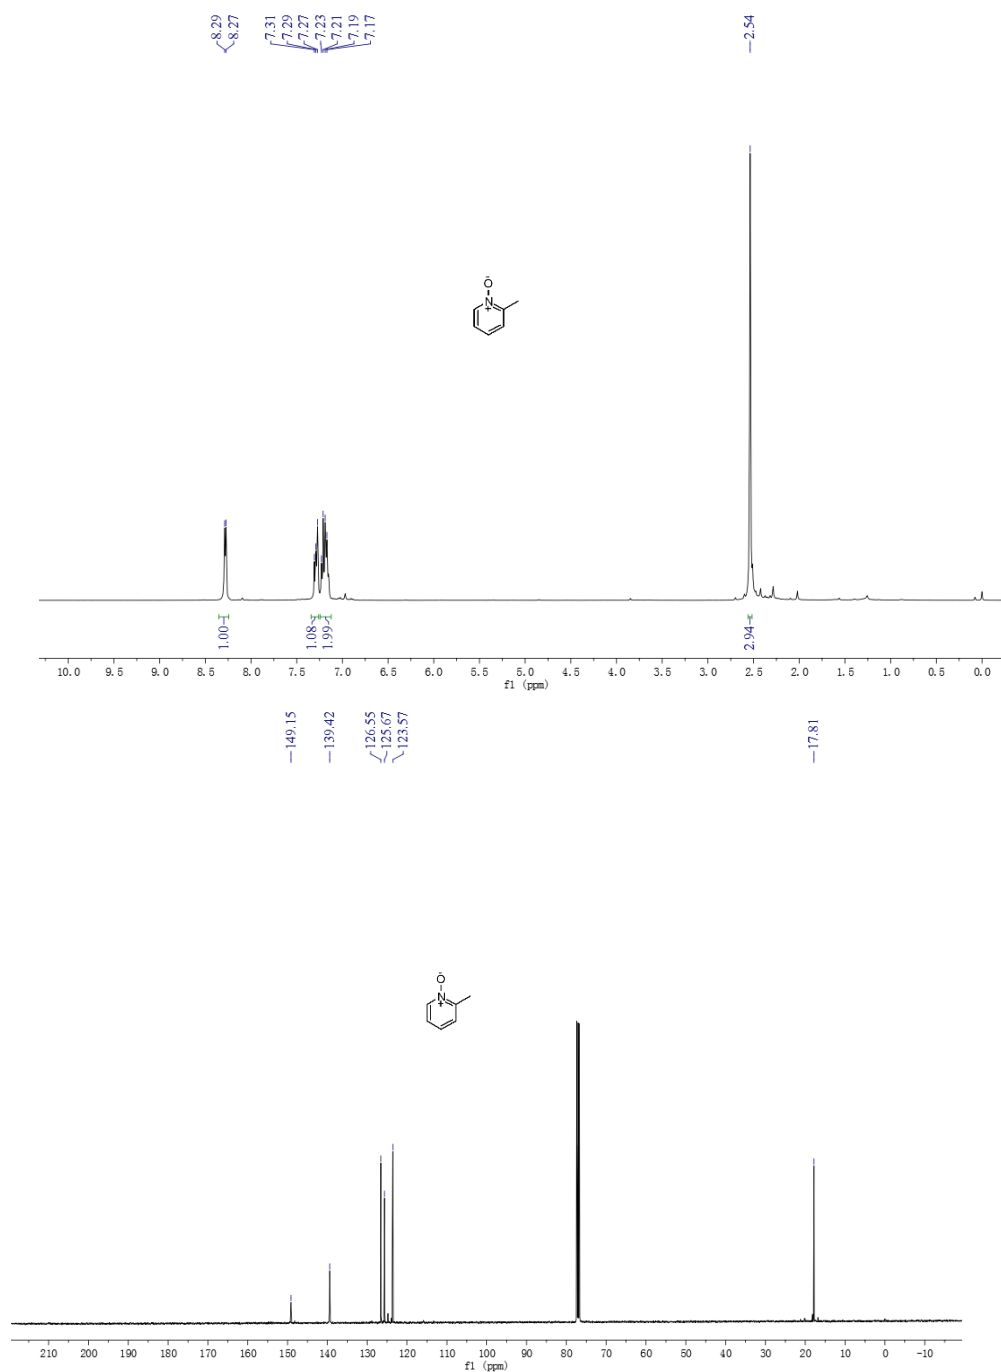

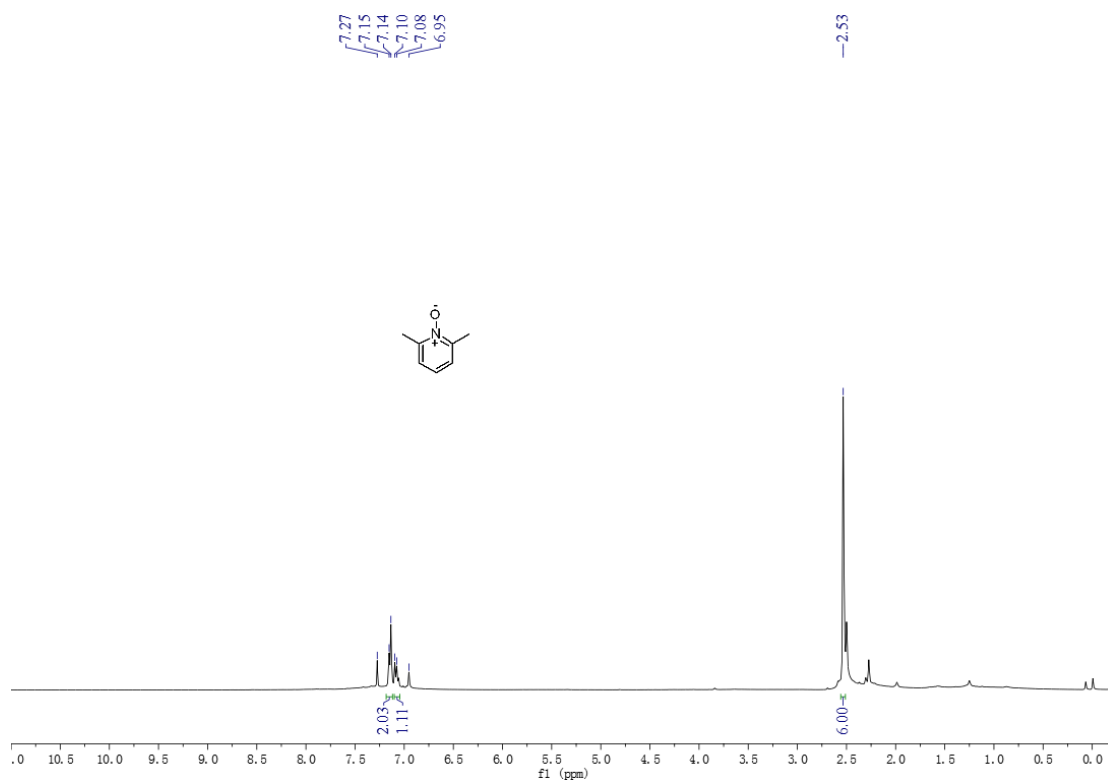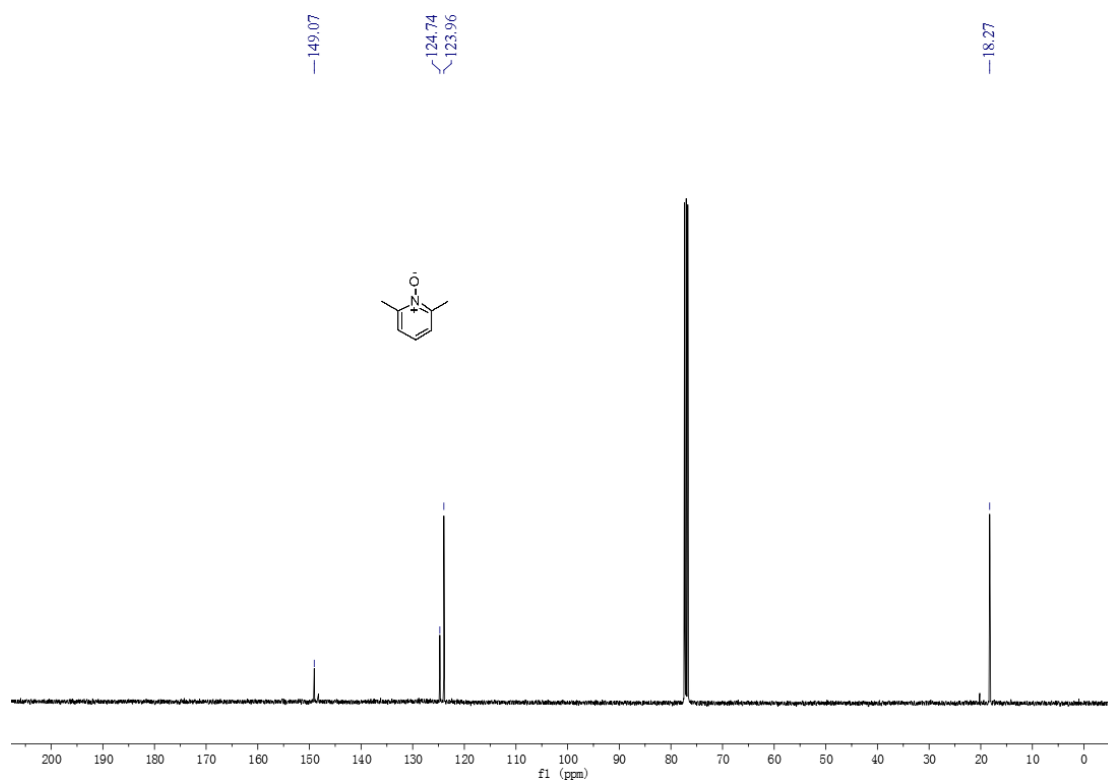

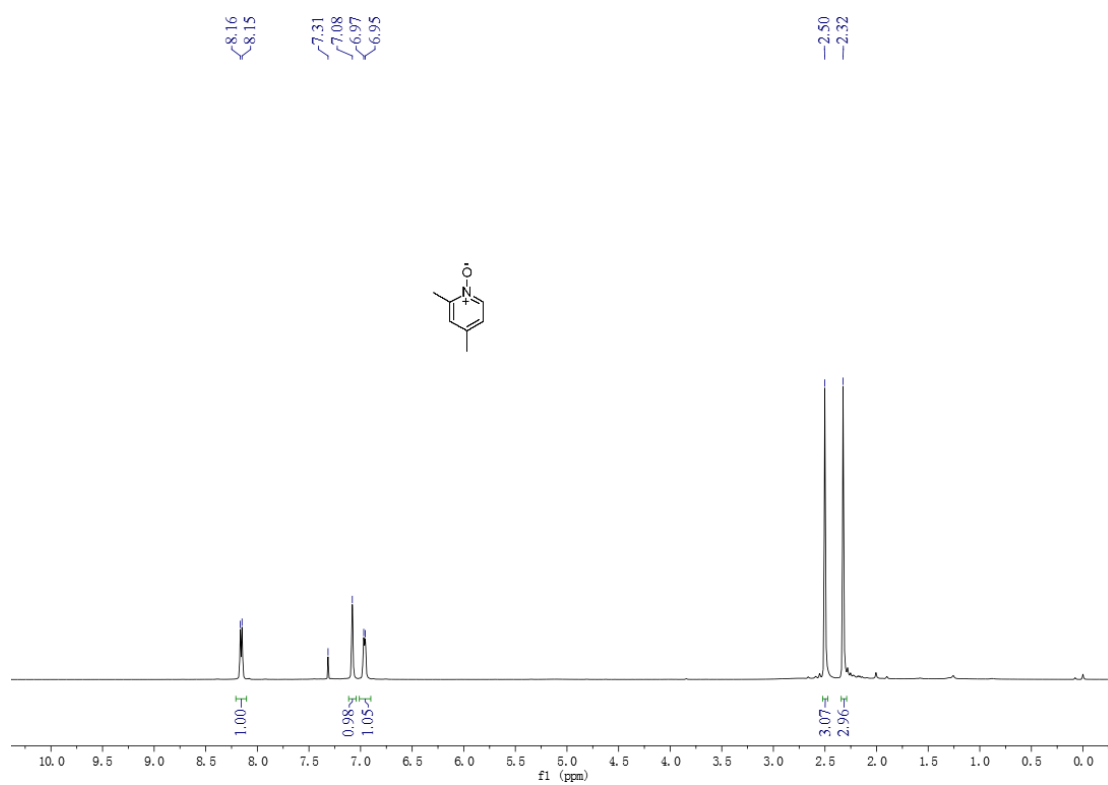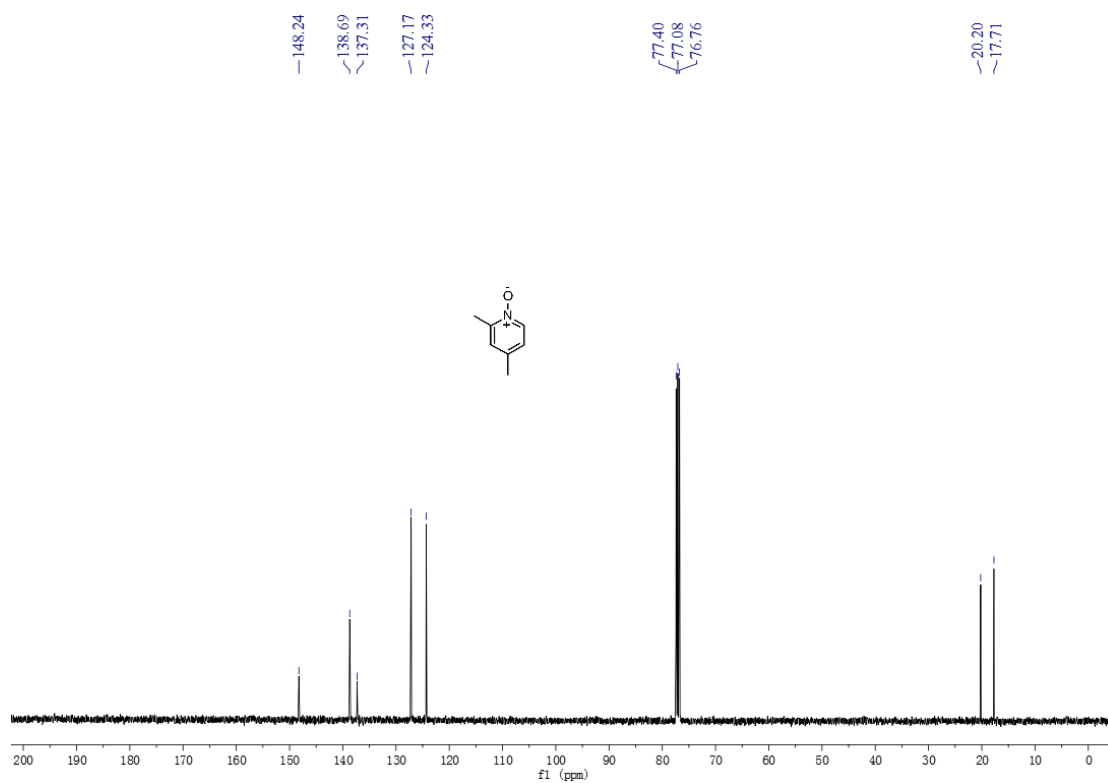



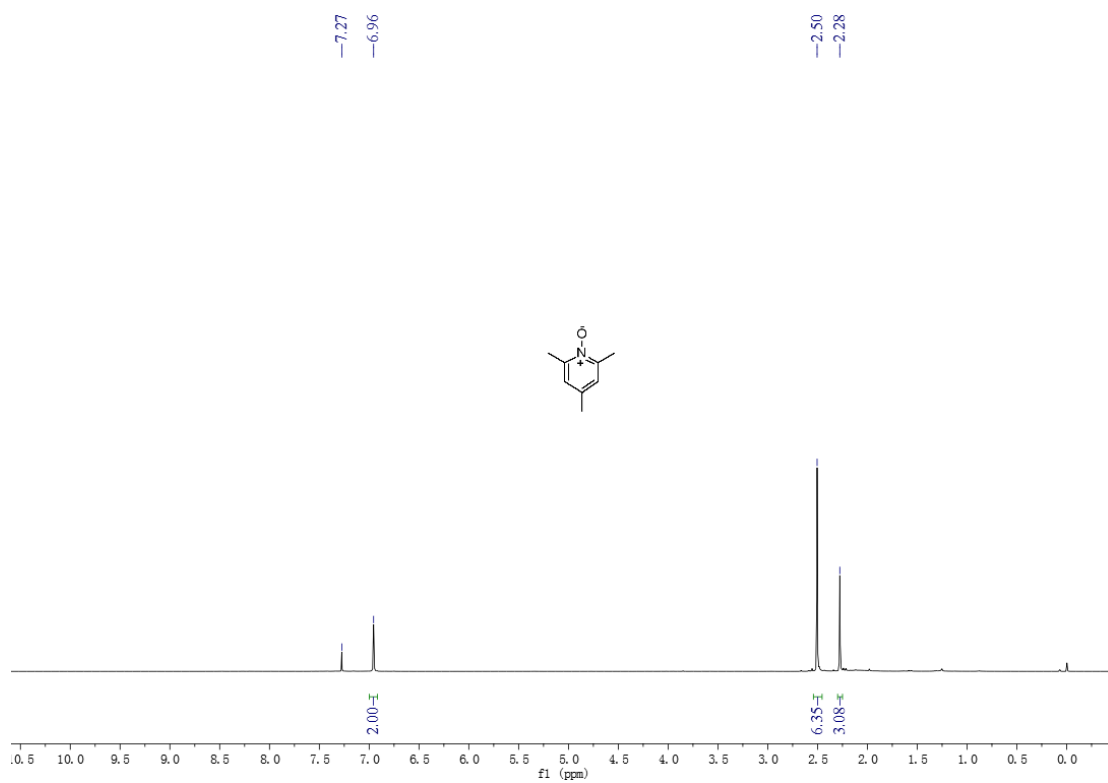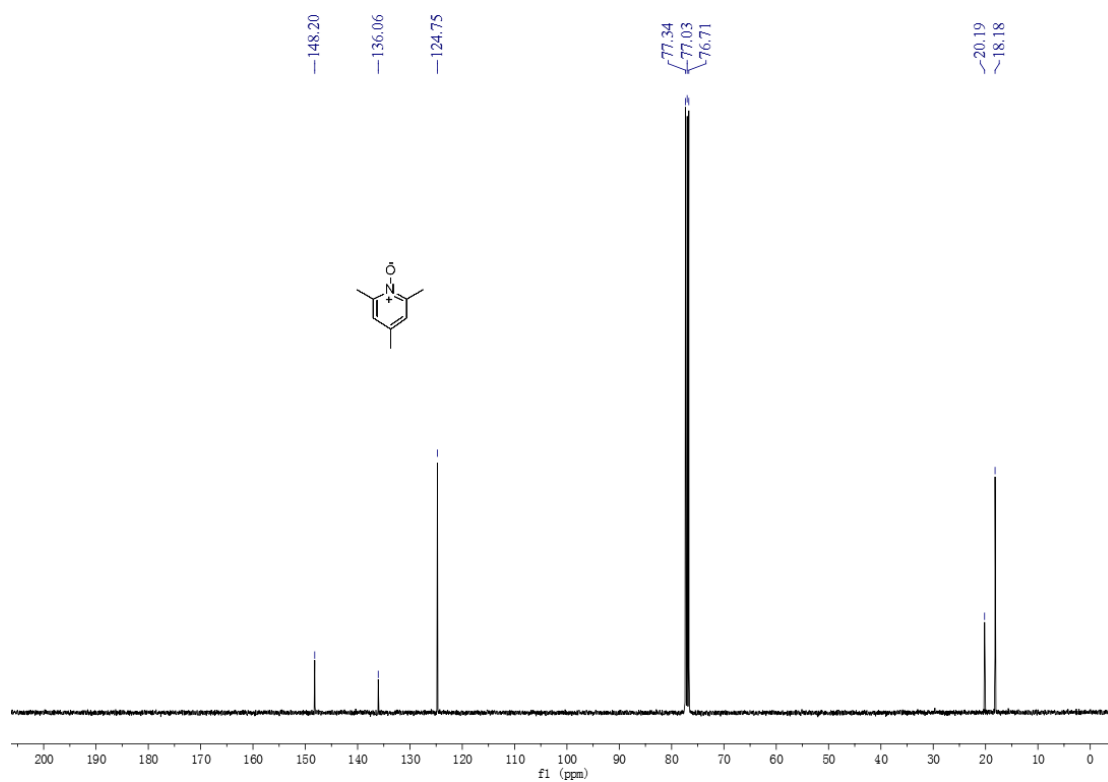

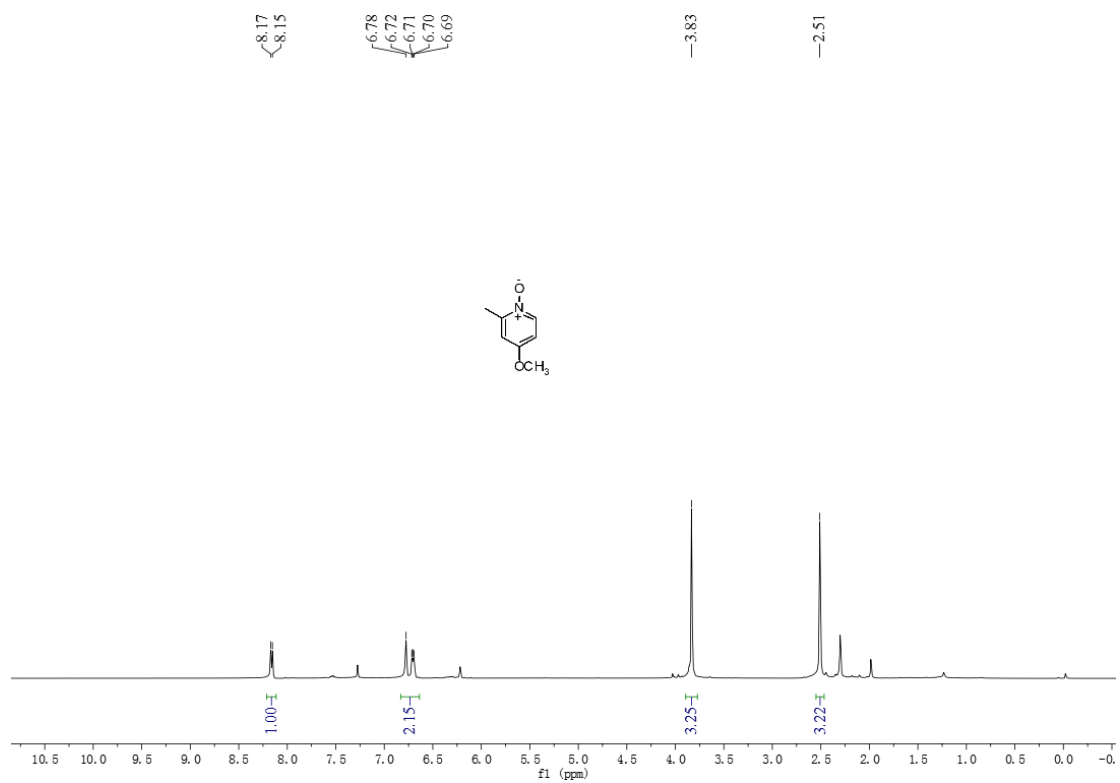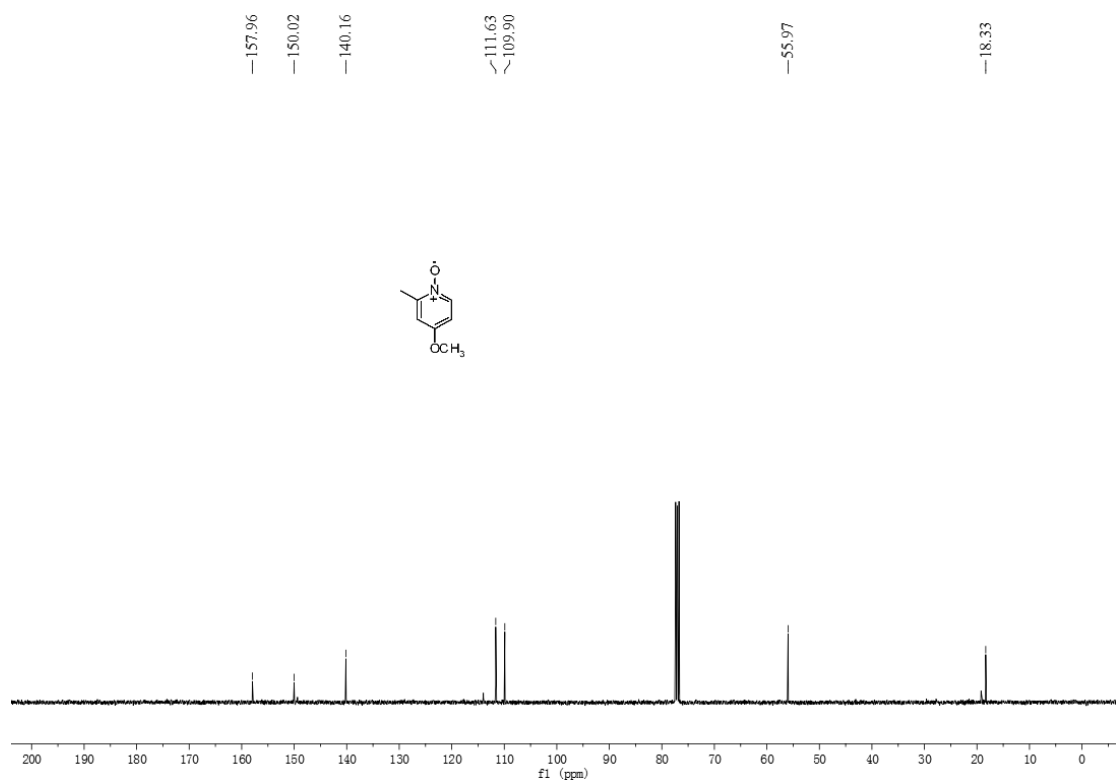

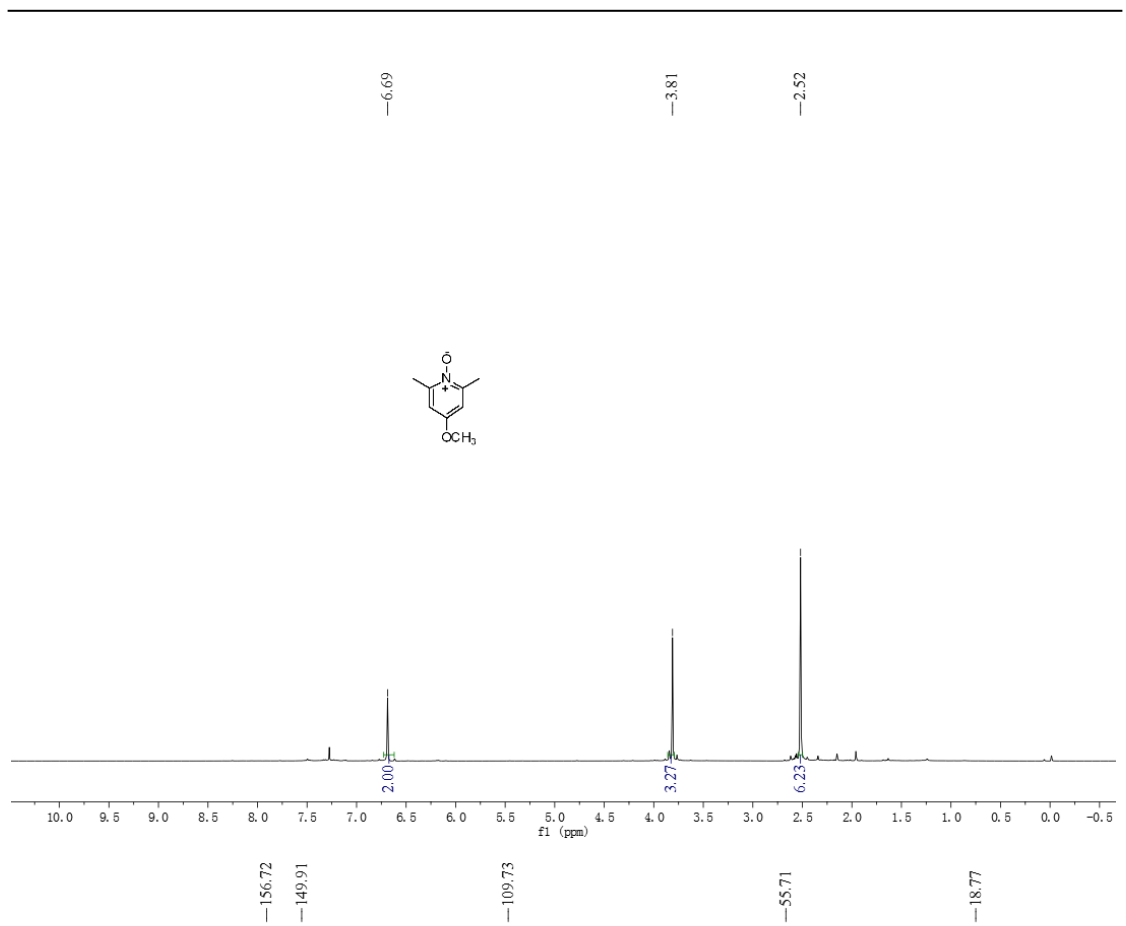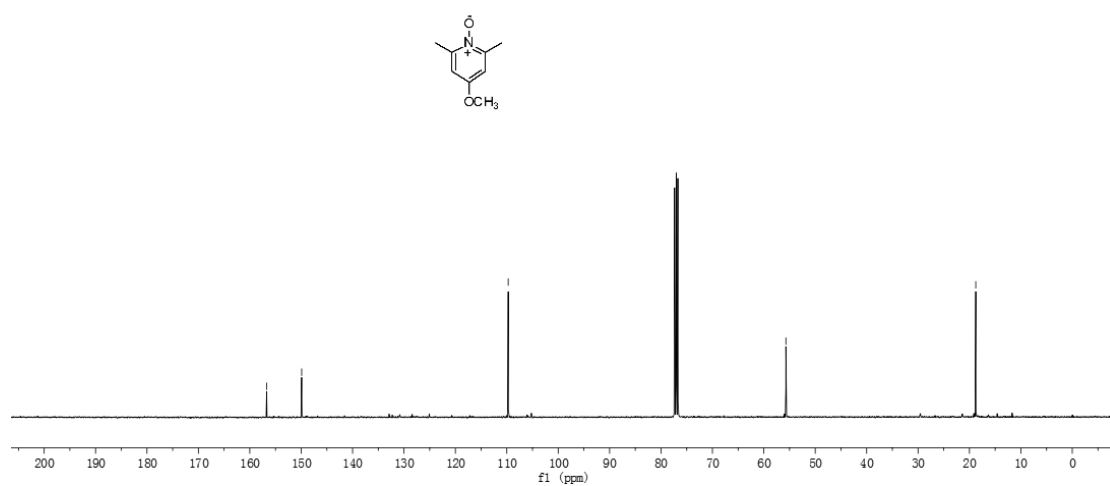

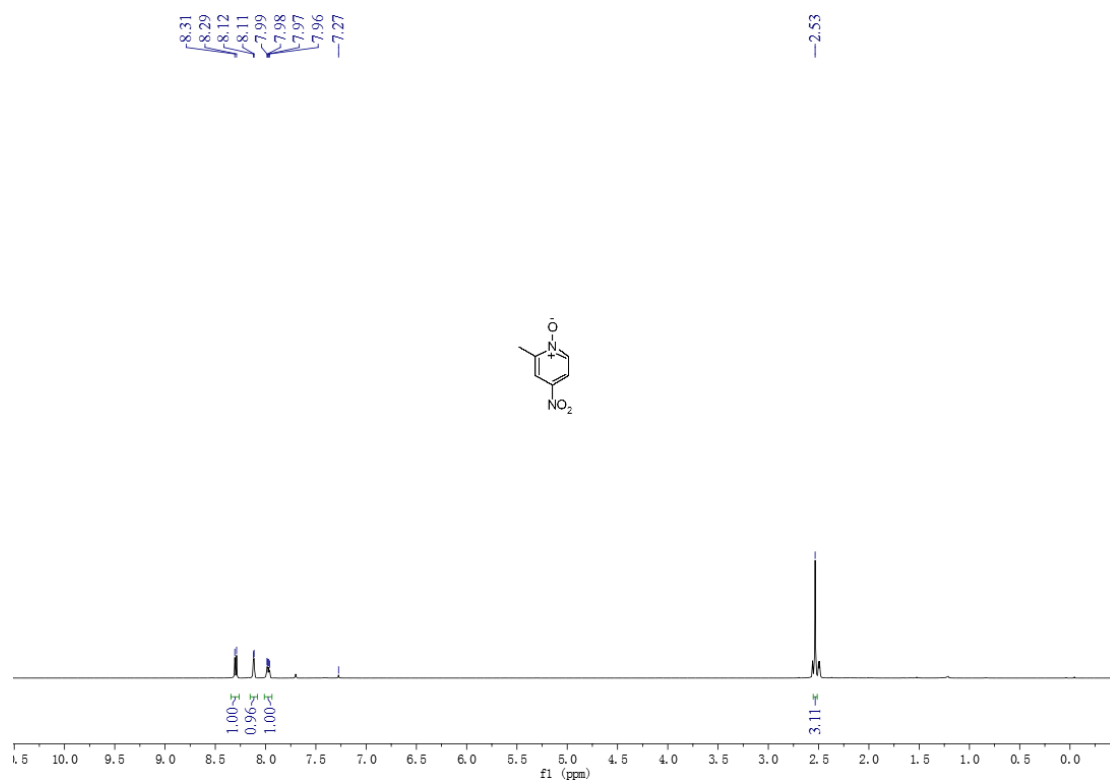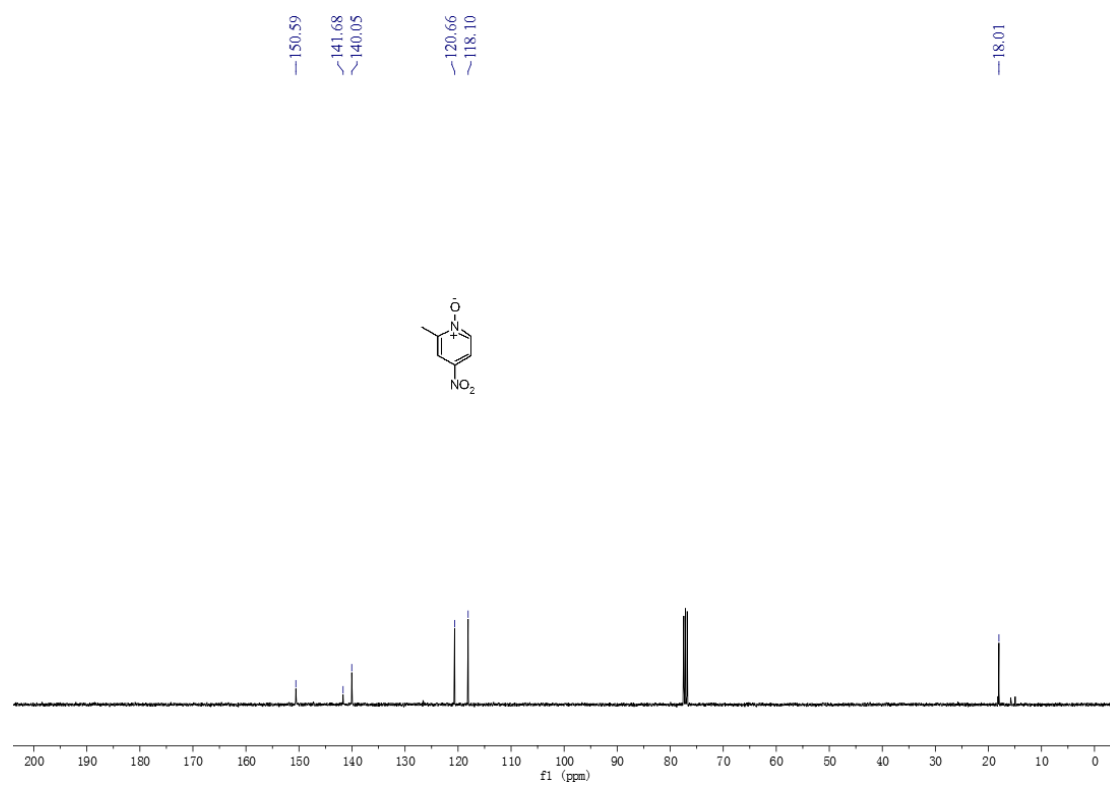

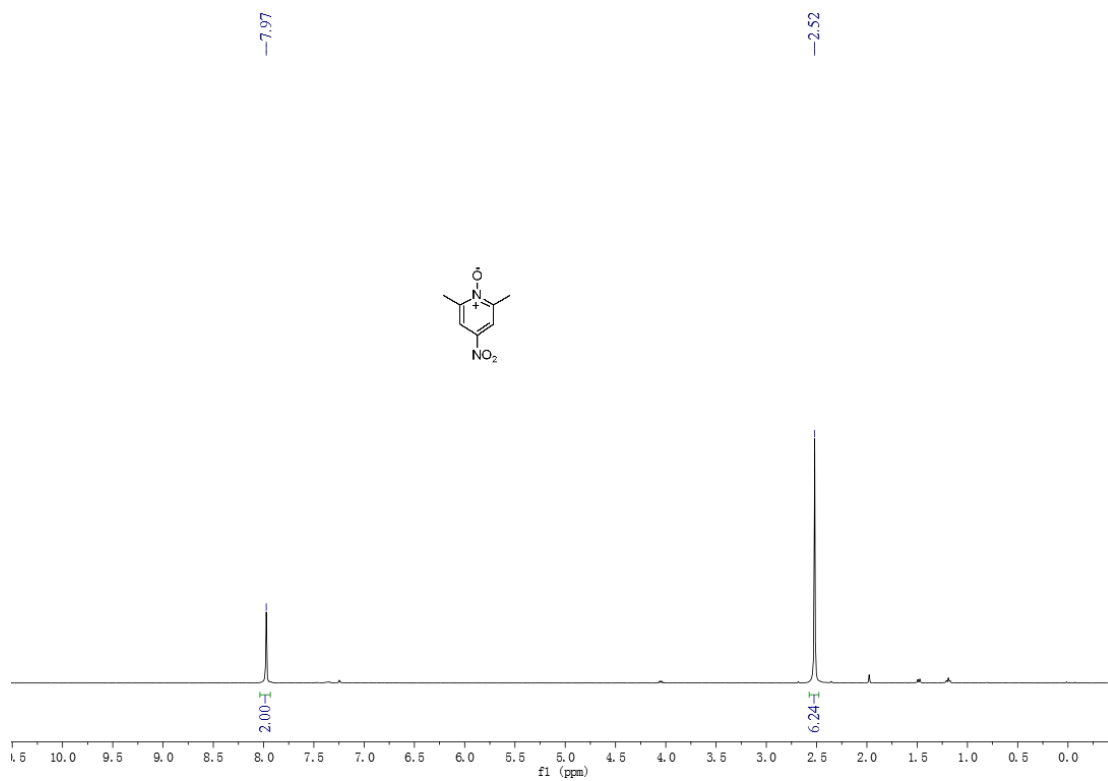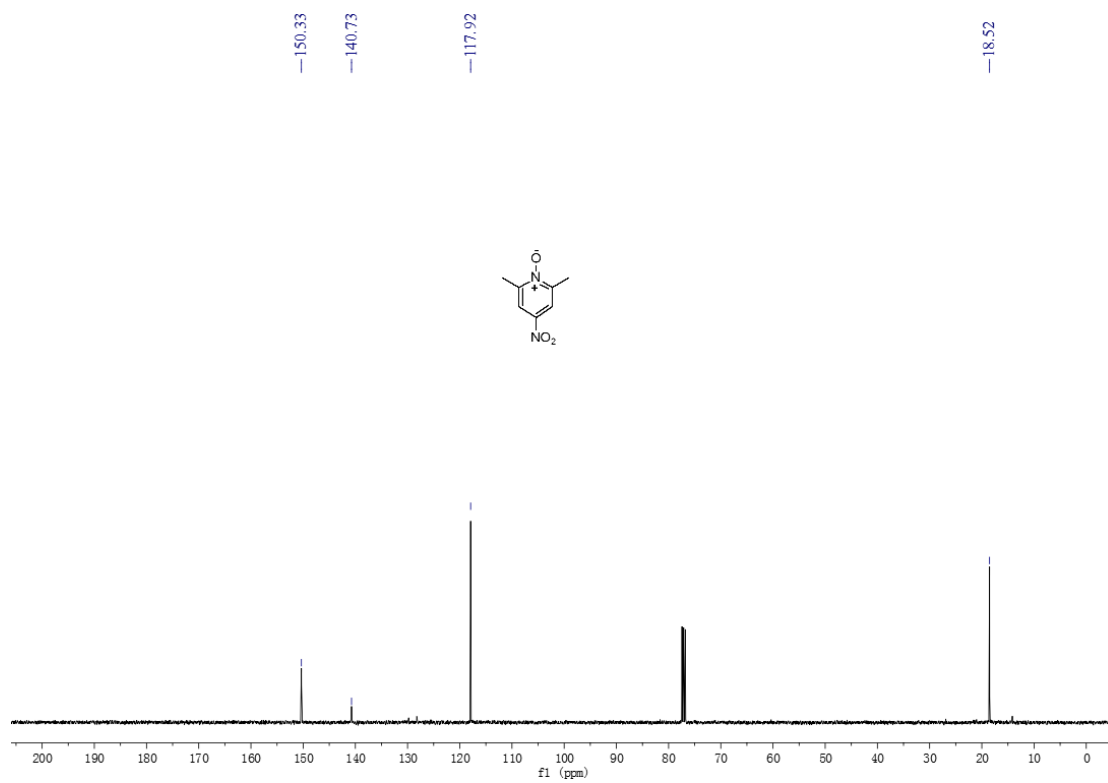

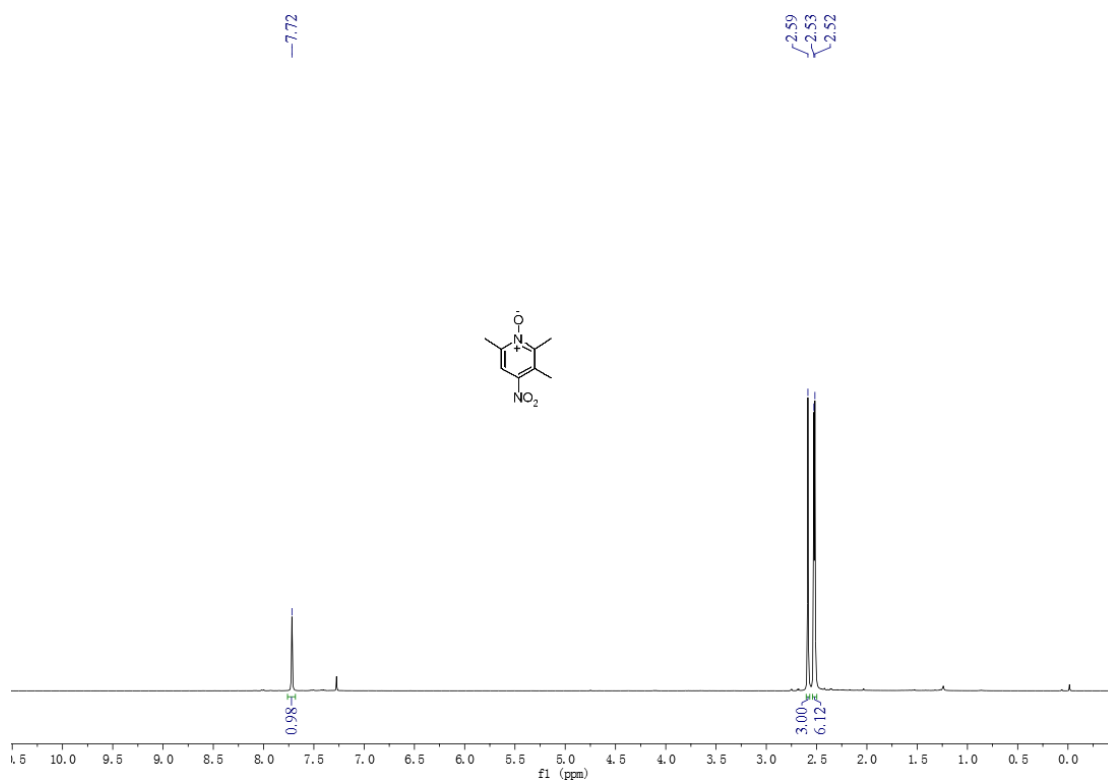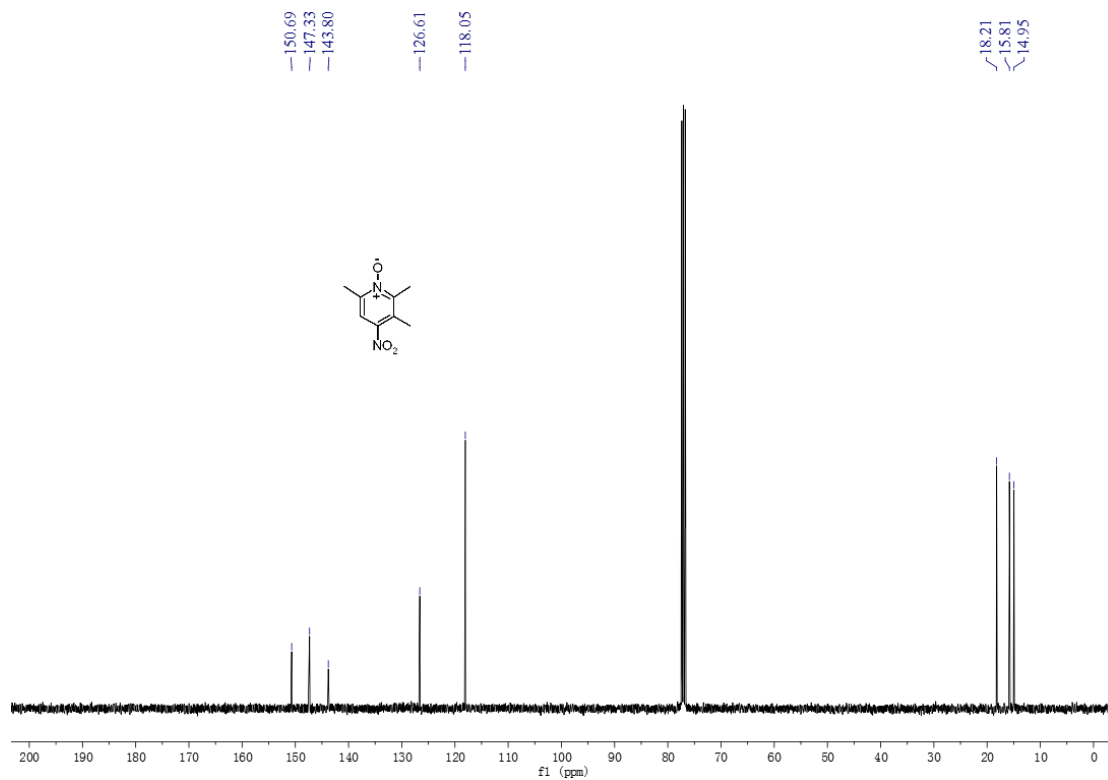

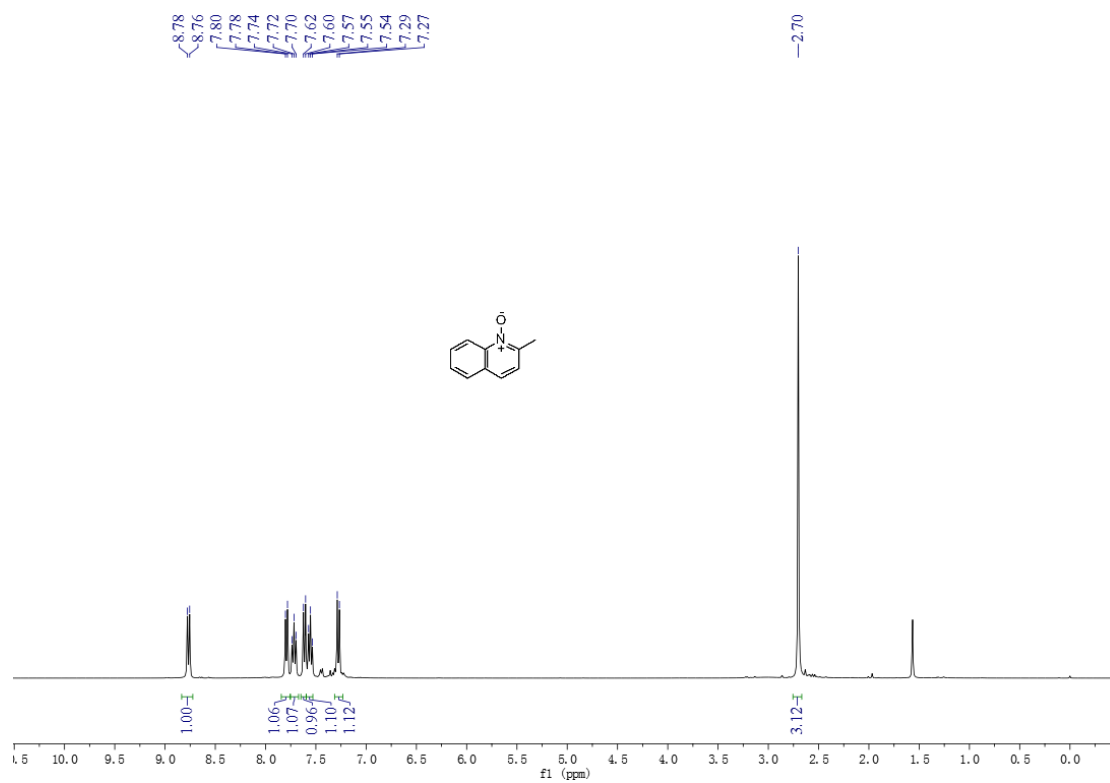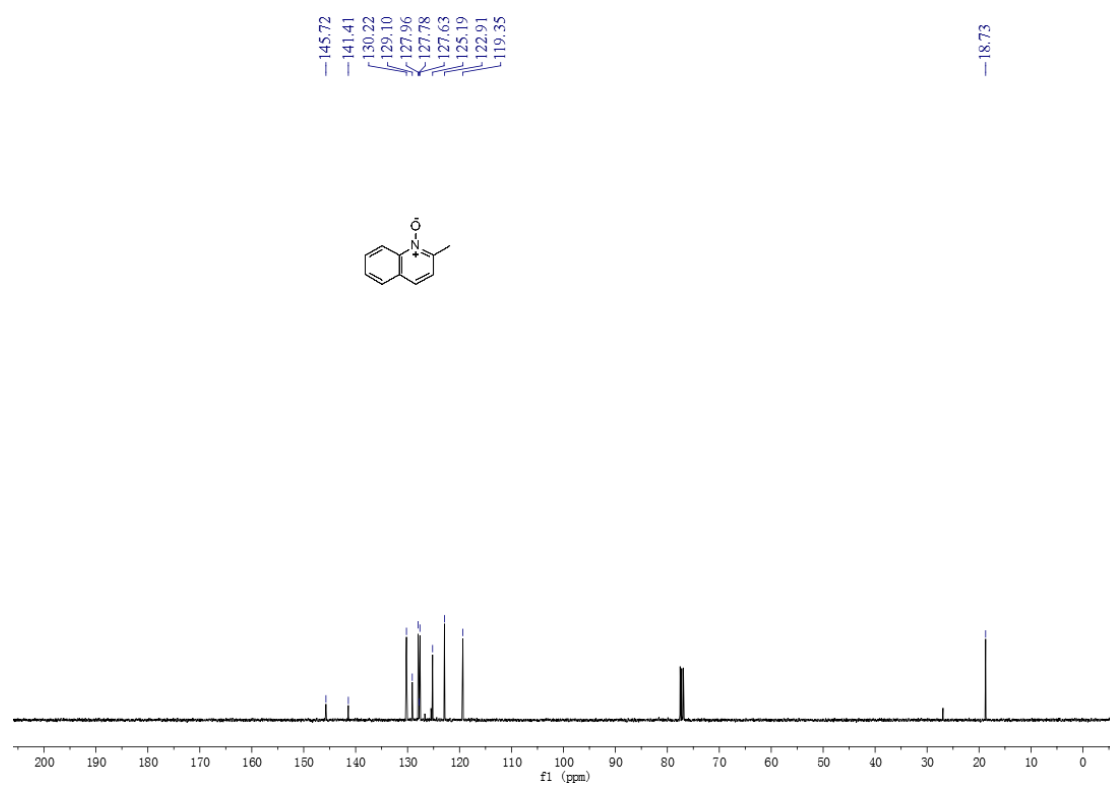

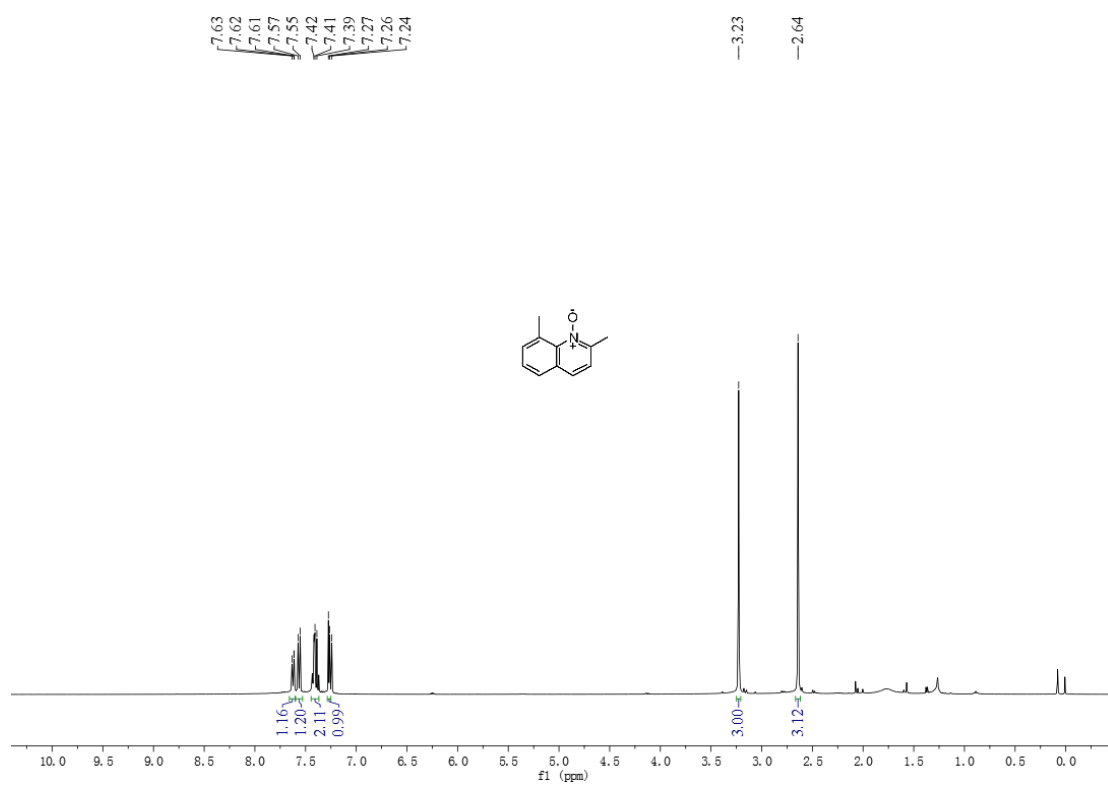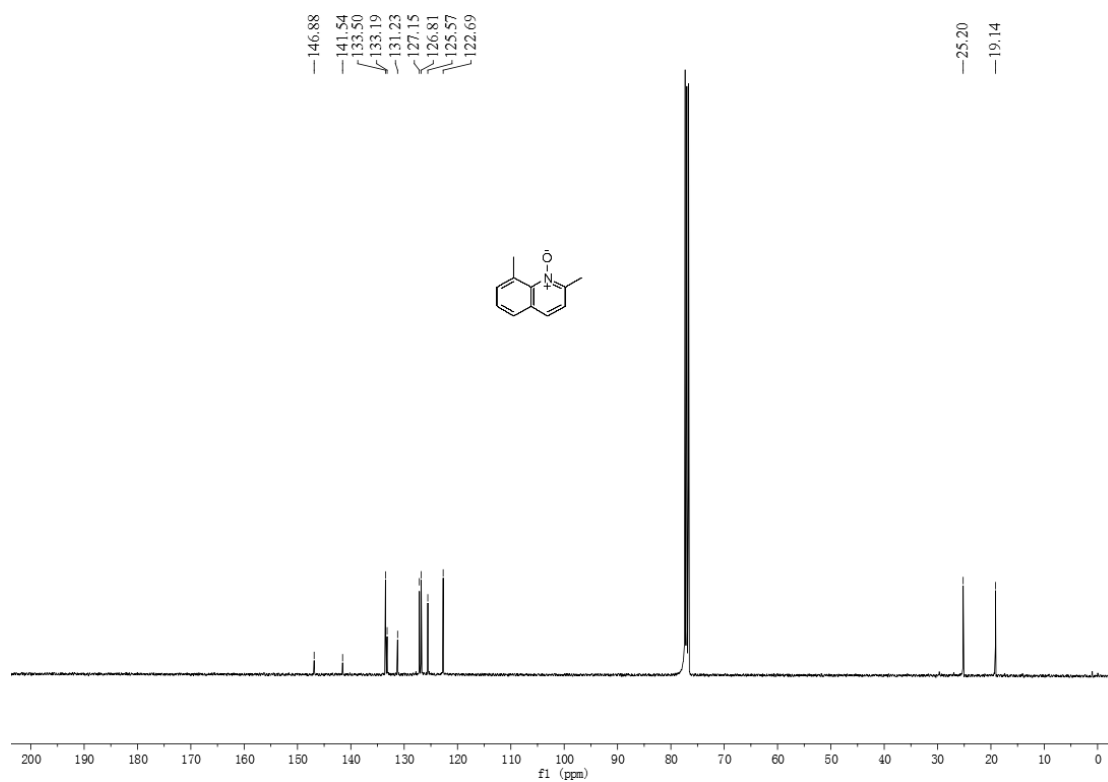



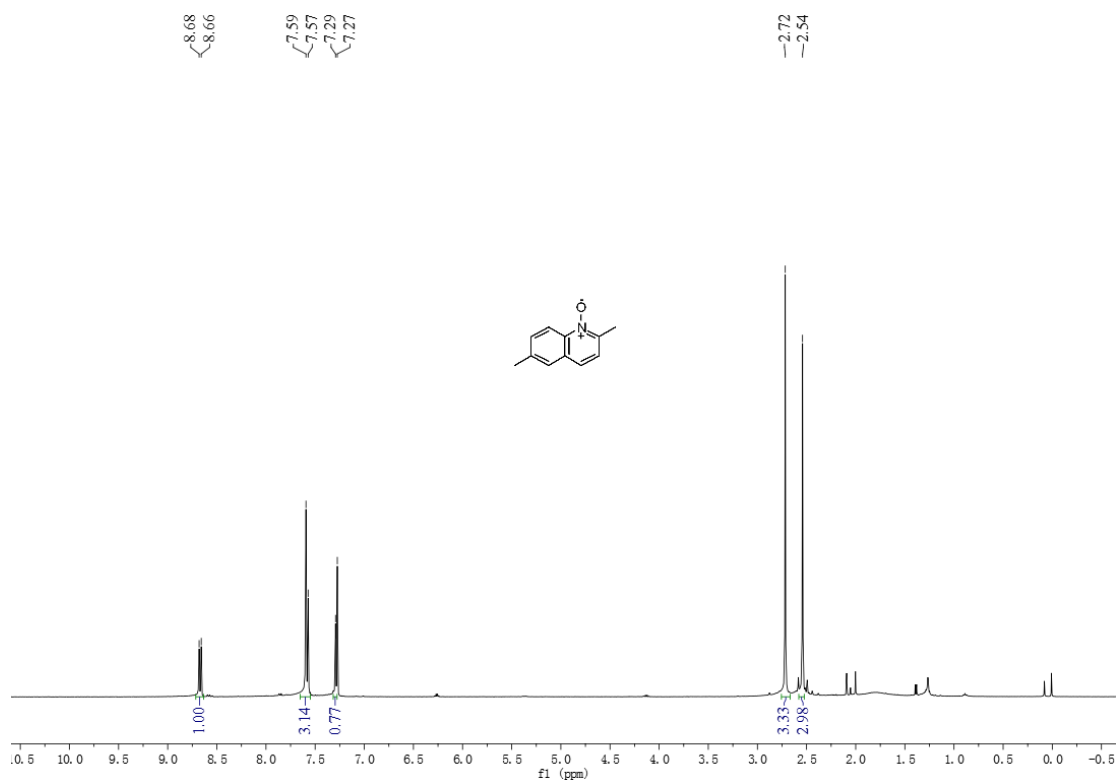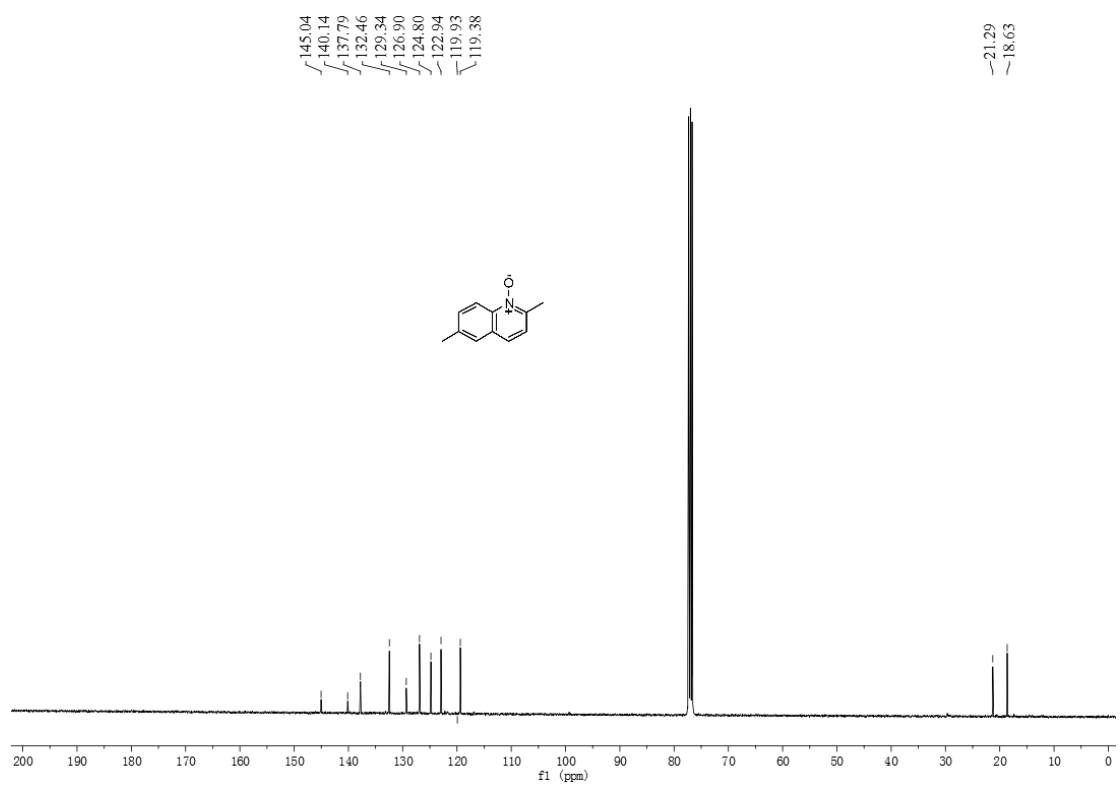

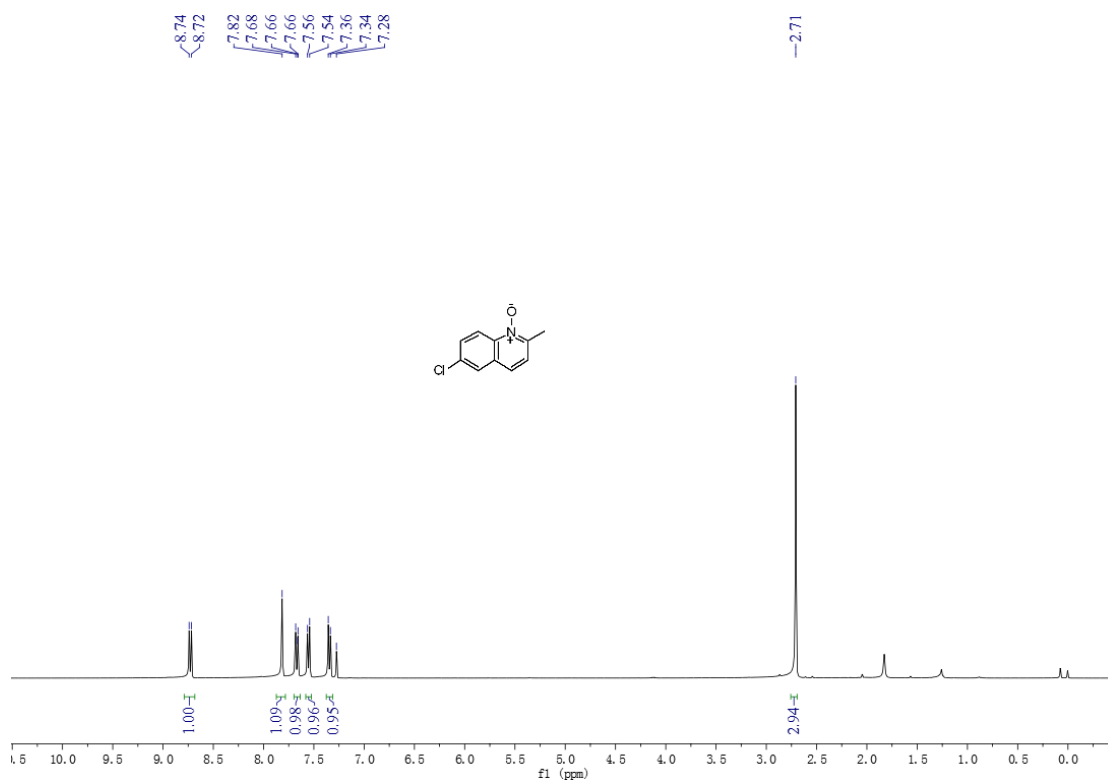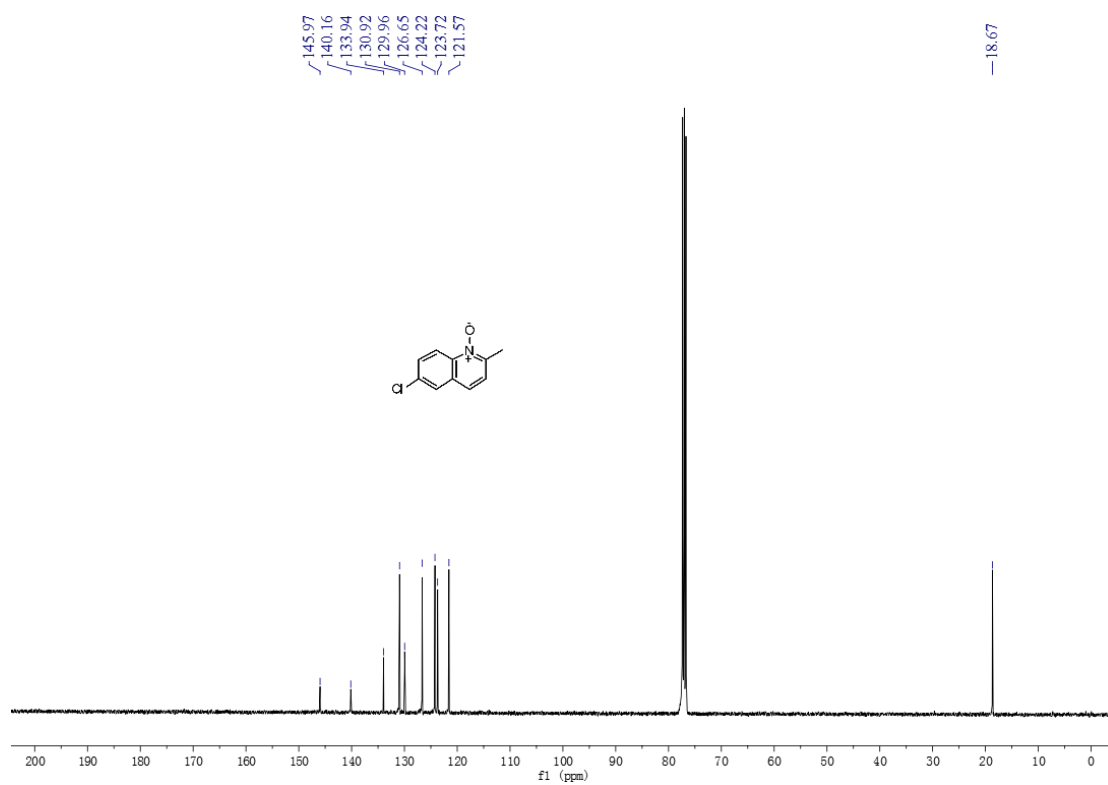

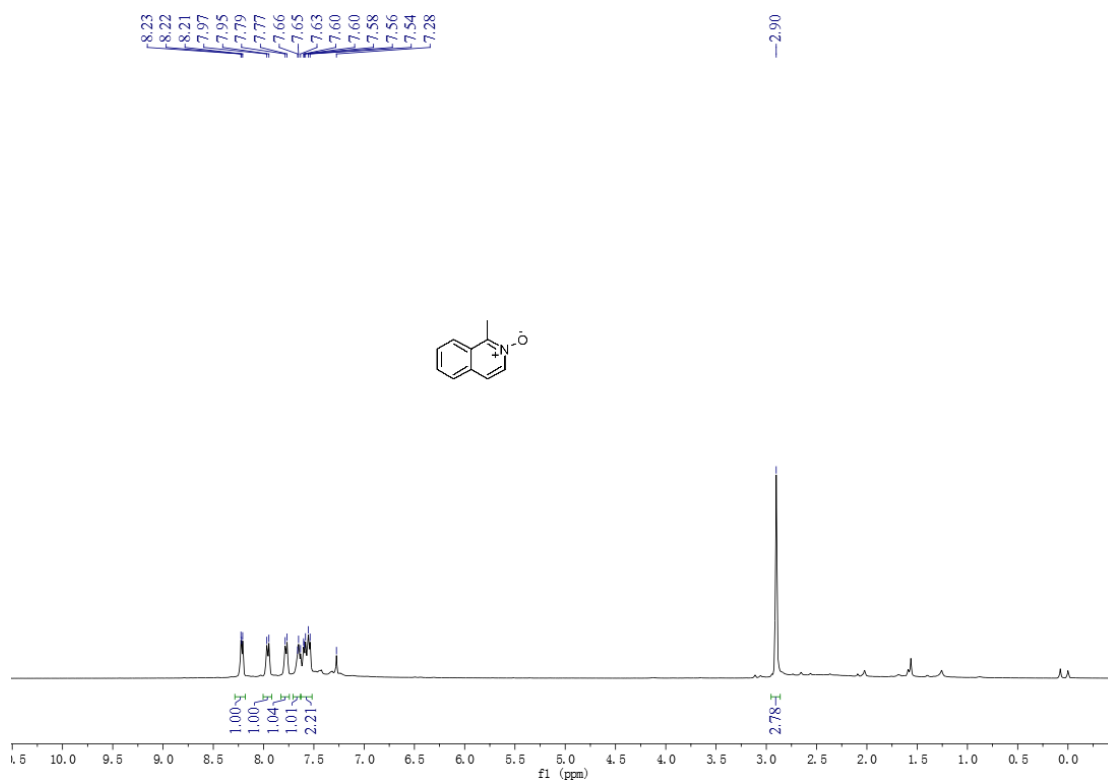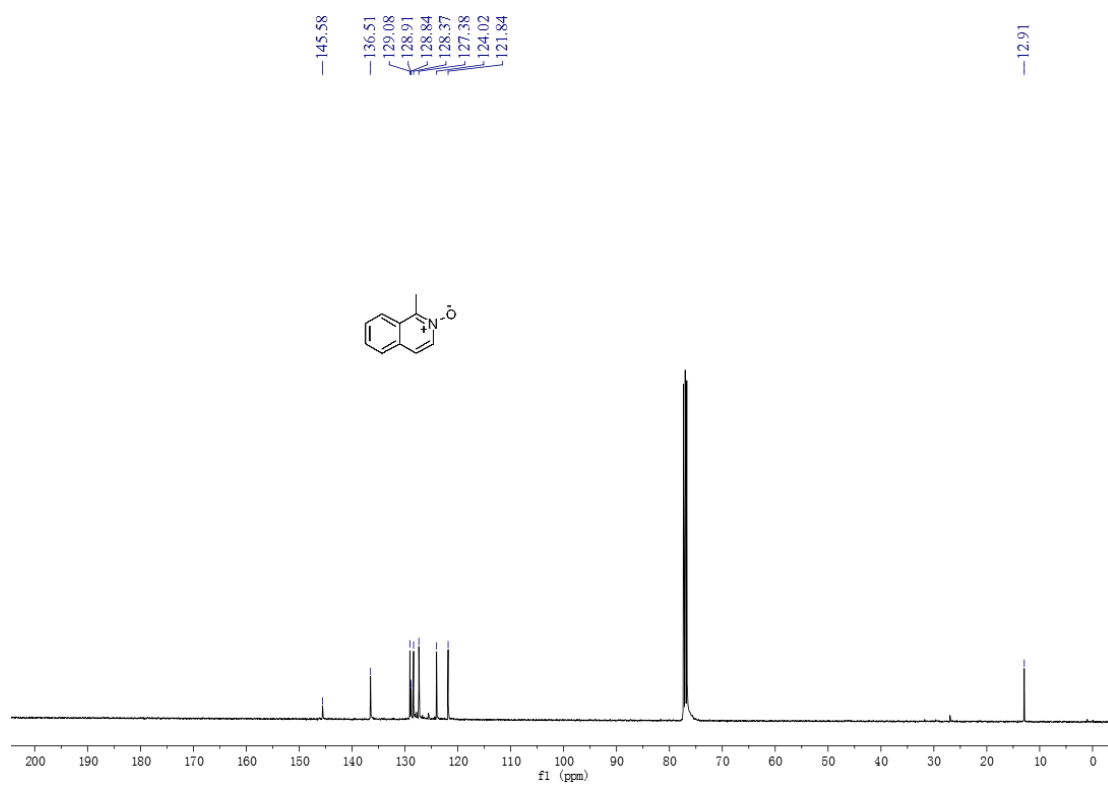

Supplement: c5ob01900a1.pdf [file c5ob01900a1.pdf]
